# Supplementary material
Source: ML conference proceedings conference paper supplement (https://openreview.net/forum?id=fem6BIJkdv)
Supplement: supplementary_material [file attachment]

---

# Representation Learning via Consistent Assignment of Views over Random Partitions

## Appendix

---

Anonymous Author(s)

Affiliation

Address

email

### 1 A Extended results

2 In this section, we expand the evaluation experiments from the main text. We use the officially  
3 released pre-trained methods across all benchmarks to represent each SSL method. We did not  
4 retrain/reimplement any competing method. In total, we pre-trained 4 instances of CARP. To evaluate  
5 CARP’s performance in a low training regime, we trained two 200-epoch models, one with multi-crop  
6 (mc) and the other without it. Similarly, to evaluate longer training performance, we trained two  
7 400-epoch models, one with multi-crop and the other without it.

#### 8 A.1 Transfer learning evaluation

9 In Table A.1, we report detailed results for the transfer learning  $k$ -NN experiments. We evaluate SSL  
10 methods for values of  $k \in \{10, 20, 100, 200\}$ , including all instances of CARP. Cf. Appendix D.3 for  
11 the evaluation protocol.

12 **CARP achieved either top-1 or top-2 performance in seven out of 8 datasets.** STL-10 is the only  
13 dataset where CARP is neither the top-1 nor top-2. **Moreover, in the FGVCAircraft, Stanford**  
14 **Cars, and GTSRB datasets, CARP archived top-1 and top-2 performances with large margins.**  
15 The average  $k$ -NN performance per value of  $k$  across all datasets is reported in Table 1 in the main  
16 text.

#### 17 A.2 Image retrieval and copy detection

18 Tables A.2 and A.3 show additional results for image retrieval and copy detection evaluations. For  
19 both tasks, we compare CARP’s performance against nine SSL methods. We report mAP on the  
20 Medium and Hard splits of the revisited Oxford and Paris datasets for image retrieval. We report  
21 mAP on the “strong” set of the Copydays dataset for copy detection.

#### 22 A.3 Few-shot evaluation

23 Table A.4 shows additional few-shot evaluation results on the Pascal VOC07 and INat-2018 datasets.  
24 We report mAP and top-1 accuracy @ $k$ , averaged over 5 independent runs, for VOC07 and INat-2018,  
25 respectively. We include CARP’s 200 and 400 multi-crop models. Cf. Appendix D.2 for details on  
26 the evaluation protocol.

#### 27 A.4 Dense prediction evaluation

28 We evaluated our CARP’s multi-crop model on the object detection downstream tasks using the  
29 Pascal VOC07 dataset. We followed the guidelines from He et al. [11]. We fine-tuned for 24k  
30 iterations on PASCAL VOC trainval07+12 and evaluated on test2007. CARP performs at AP=44.2,

Table A.1: **Transfer learning evaluation.** We compare CARP’s performance against nine SSL methods on eight datasets. We report results for  $k \in \{10, 20, 100, 200\}$ . Top methods in **bold**, top-2 underlined. Methods with (mc) use multi-crop.

| Method        | ep   | Oxford-IIIT Pet |             |             |             | Oxford Flowers-102 |             |             |             | FGVCAircraft |             |             |             | Stanford Cars |             |             |             |
|---------------|------|-----------------|-------------|-------------|-------------|--------------------|-------------|-------------|-------------|--------------|-------------|-------------|-------------|---------------|-------------|-------------|-------------|
|               |      | 10              | 20          | 100         | 200         | 10                 | 20          | 100         | 200         | 10           | 20          | 100         | 200         | 10            | 20          | 100         | 200         |
| oBoW (mc)     | 200  | 55.8            | 57.3        | 57.2        | 57.5        | 63.5               | 61.9        | 58.9        | 59.4        | 19.1         | 18.1        | 15.8        | 14.9        | 11.9          | 11.5        | 10.9        | 10.5        |
| SeLa-v2       | 400  | 66.7            | 66.8        | 65.8        | 66.0        | 59.5               | 58.6        | 56.8        | 57.2        | 21.3         | 20.7        | 18.1        | 16.4        | 13.3          | 13.3        | 13.5        | 13.4        |
| InfoMin       | 800  | 78.0            | 77.8        | 76.6        | 76.2        | 63.6               | 61.9        | 60.1        | 60.8        | 18.9         | 18.2        | 15.8        | 13.4        | 14.7          | 14.4        | 13.2        | 12.9        |
| SWAV (mc)     | 800  | 77.2            | 77.0        | 74.9        | 74.5        | 76.4               | 75.2        | 73.7        | 74.6        | 29.6         | 29.0        | 27.5        | 25.1        | 22.7          | 22.7        | 21.8        | 21.0        |
| DINO (mc)     | 800  | 81.5            | 80.9        | 79.0        | 78.9        | <b>82.3</b>        | <b>81.6</b> | <b>80.8</b> | <b>81.2</b> | 36.1         | 35.3        | 33.5        | 31.1        | <u>30.0</u>   | <u>30.1</u> | 28.9        | 27.5        |
| DeepC v2 (mc) | 800  | 79.0            | 78.3        | 76.3        | 75.4        | 78.3               | 76.3        | 75.3        | 76.0        | 32.5         | 32.0        | 28.9        | 26.5        | <u>25.2</u>   | <u>25.0</u> | 23.4        | 22.1        |
| Triplet       | 980  | 83.3            | 83.5        | 82.4        | 82.4        | 78.5               | 77.7        | 76.9        | 77.3        | 33.3         | 33.4        | 31.7        | 29.6        | 24.4          | 25.2        | 25.5        | 25.0        |
| MoCo v3       | 1000 | 86.6            | 86.4        | 85.8        | 85.8        | 79.8               | 79.0        | 78.3        | 78.6        | 37.7         | 36.9        | 33.5        | 32.1        | 28.6          | 29.3        | 28.4        | 27.2        |
| BarlowT       | 1000 | <u>82.5</u>     | <u>82.9</u> | <u>82.2</u> | 82.3        | 79.8               | 78.8        | 77.9        | 78.1        | 32.9         | 32.7        | 30.6        | 29.2        | 25.9          | 26.3        | 26.1        | 25.2        |
| CARP          | 200  | <b>86.8</b>     | <b>86.8</b> | <b>86.2</b> | 85.9        | 79.0               | 78.2        | 77.4        | 77.7        | <u>40.5</u>  | <u>38.9</u> | 36.0        | <u>34.4</u> | 29.4          | 29.8        | 29.6        | 29.6        |
|               | 400  | 86.4            | <b>86.8</b> | <b>86.2</b> | <u>86.0</u> | 81.0               | 80.0        | 79.3        | 79.6        | <b>42.5</b>  | <b>42.1</b> | <b>39.3</b> | <b>38.6</b> | <b>32.6</b>   | <b>33.5</b> | <b>32.6</b> | <b>31.5</b> |
| CARP (mc)     | 200  | 78.7            | 78.7        | 77.1        | 76.8        | 80.6               | 79.7        | 78.7        | 78.8        | 35.7         | 35.0        | 32.4        | 30.6        | 26.4          | 26.6        | 25.4        | 24.3        |
|               | 400  | 83.9            | 83.9        | 83.6        | 83.2        | 81.4               | 80.3        | 79.0        | 79.6        | 35.2         | 34.8        | 32.4        | 30.7        | 26.6          | 27.1        | 26.1        | 24.9        |

  

| Method        | ep   | Country-211 |             |             |             | Food-101    |             |             |             | STL-10      |             |             |             | GTSRB       |             |             |             |
|---------------|------|-------------|-------------|-------------|-------------|-------------|-------------|-------------|-------------|-------------|-------------|-------------|-------------|-------------|-------------|-------------|-------------|
|               |      | 10          | 20          | 100         | 200         | 10          | 20          | 100         | 200         | 10          | 20          | 100         | 200         | 10          | 20          | 100         | 200         |
| oBoW (mc)     | 200  | 11.7        | 12.0        | 11.8        | 11.4        | 45.8        | 47.4        | 47.3        | 46.0        | <u>96.6</u> | <u>96.6</u> | <b>96.3</b> | 95.7        | 50.1        | 50.6        | 49.9        | 48.2        |
| SeLa-v2       | 400  | 10.1        | 10.5        | 11.0        | 11.0        | 45.7        | 46.8        | 46.6        | 45.5        | <u>94.0</u> | <u>94.0</u> | 93.5        | 93.3        | 58.1        | 59.0        | 58.7        | 57.9        |
| InfoMin       | 800  | 11.2        | 11.6        | 11.9        | 11.9        | 51.5        | 52.4        | 51.4        | 49.5        | 96.5        | 96.4        | <u>96.2</u> | <b>96.0</b> | 54.9        | 54.8        | 53.5        | 52.3        |
| SWAV (mc)     | 800  | 13.6        | 13.8        | 13.1        | 12.7        | 57.9        | 59.1        | 58.2        | 57.0        | 95.5        | 95.2        | <u>94.0</u> | 93.0        | 62.9        | 63.2        | 61.6        | 60.0        |
| DINO (mc)     | 800  | <u>14.1</u> | <u>14.4</u> | <u>14.2</u> | 13.6        | 60.9        | 62.0        | <u>61.4</u> | 60.0        | 95.9        | 95.6        | 94.7        | 93.8        | 62.7        | 62.9        | 62.6        | 61.8        |
| DeepC v2 (mc) | 800  | 13.3        | 13.6        | 12.5        | 12.1        | 61.2        | 62.3        | <u>61.4</u> | 60.1        | 95.7        | 95.6        | 94.5        | 93.3        | 62.9        | 63.4        | 62.4        | 61.3        |
| Triplet       | 980  | 13.7        | 14.1        | <b>14.3</b> | <b>14.2</b> | <u>60.1</u> | <u>61.5</u> | <u>61.0</u> | <u>60.0</u> | 95.7        | 95.6        | 94.9        | 94.5        | 63.4        | 63.5        | 62.9        | 62.0        |
| MOCO v3       | 1000 | 12.4        | 12.4        | 13.2        | 13.2        | 59.0        | 60.0        | 59.1        | 57.7        | <b>96.9</b> | <b>96.7</b> | <u>96.2</u> | <u>95.9</u> | 72.4        | 72.8        | 72.6        | 71.7        |
| BarlowT       | 1000 | 12.8        | 13.3        | 13.7        | 13.6        | 60.3        | 61.4        | 60.7        | 59.4        | 94.8        | 94.8        | <u>94.2</u> | <u>93.8</u> | 65.3        | 65.6        | 65.6        | 64.4        |
| CARP          | 200  | 11.9        | 12.2        | 12.7        | 12.8        | 57.4        | 58.4        | 57.7        | 56.3        | 95.5        | 95.5        | 94.6        | 93.9        | 73.1        | 73.7        | 73.5        | <u>72.6</u> |
|               | 400  | 11.9        | 12.3        | 12.8        | 12.8        | 57.6        | 58.4        | 57.6        | 56.3        | 96.1        | 95.9        | 95.0        | 94.3        | <b>74.7</b> | <b>75.3</b> | <b>75.2</b> | <b>74.4</b> |
| CARP (mc)     | 200  | <b>14.2</b> | <b>14.5</b> | <b>14.3</b> | <u>13.9</u> | 60.5        | 61.8        | 60.7        | 59.3        | 95.8        | 95.5        | 94.1        | 93.4        | 64.6        | 64.7        | 64.2        | 63.0        |
|               | 400  | <u>14.1</u> | <u>14.2</u> | <b>14.3</b> | <u>13.9</u> | <b>61.7</b> | <b>62.9</b> | <b>62.1</b> | <b>60.7</b> | 95.9        | 95.5        | 94.3        | 93.4        | 62.2        | 62.8        | 62.4        | 61.4        |

AP50=79.4, and AP75=47.6; results are averaged over 5 trials. Compared to other SSL methods, such as MoCo-v2 Chen et al. [6] (AP=57.4 AP50=82.5 AP75=64.0), CARP underperforms significantly.

## B Ablations

Due to a limited execution budget, the ablations and the main experiments differ slightly in some hyperparameters. Here, we describe the configurations used for the ablations—for the main experiments, see Appendix C.1. For ablations, we trained CARP using the full ImageNet-1M dataset for 50 epochs. The projection head learns a latent representation of 128-dim. The batch size is set to 256 observations, and the projection head hidden layers contain 2048 neurons. We set the number of learnable prototypes  $K = 65\,536$ , and the number of random partition blocks  $N_P = 128$ . Hence, each block contains  $N_B = 512$  prototypes. We report results for single runs.

### B.1 Does the number of learnable prototypes affect the learned representations?

Table B.1 examines the effect of training CARP with different configurations of prototypes  $K$ . Similar to other clustering-based SSL methods [3, 4, 13], CARP also benefits from over-clustering. As the number of trainable prototypes  $K$  grows, the  $k$ -NN performance of the learned representations increases. In addition, note that if the number of prototypes  $K$  is smaller than the number of actual classes in the dataset, the  $k$ -NN performance of the learned representations degrades. Based on these experiments, we set the default number of prototypes  $K = 65\,536$  for the ImageNet-1M dataset.

Table A.2: **Image retrieval evaluation.** We report mAP performance of various self-supervised methods for the image retrieval downstream task on the revisited Oxford and Paris datasets. All SLL methods were pre-trained on ImageNet-1M. We used the officially released pre-trained models from respective methods for evaluation. Top-1 performers in **bold**, top-2 underlined.

| Method        | Ep   | $\mathcal{RO}_x$ |             | $\mathcal{R}_{\text{par}}$ |             |
|---------------|------|------------------|-------------|----------------------------|-------------|
|               |      | Medium           | Hard        | Medium                     | Hard        |
| Supervised    | 100  | 49.8             | 18.5        | 74                         | 52.1        |
| Scratch       |      | 1.6              | 0.7         | 4.1                        | 2.5         |
| oBoW (mc)     | 200  | 20.4             | 4.4         | 40.6                       | 16.2        |
| SeLa-v2 (mc)  | 400  | 20.1             | 4.9         | 37.1                       | 13.6        |
| InfoMin       | 800  | 24.4             | 5.7         | 44.6                       | 18.8        |
| DeepC-v2 (mc) | 800  | 32.6             | 10.9        | 50.0                       | 20.2        |
| SwAV (mc)     | 800  | 31.1             | 10.1        | 48.9                       | 20.6        |
| DINO (mc)     | 800  | 35.4             | 11.1        | 55.9                       | 27.5        |
| Triplet       | 980  | 35.3             | <u>12.0</u> | 58.2                       | 28.7        |
| VICReg        | 1000 | 32.7             | 8.5         | 57.5                       | 29.0        |
| MoCo-v3       | 1000 | 33.1             | 10.9        | <b>59.1</b>                | <b>31.3</b> |
| CARP          | 200  | 38.8             | <b>15.5</b> | <u>58.8</u>                | <u>30.4</u> |
|               | 400  | <b>38.9</b>      | 15.1        | <u>58.5</u>                | 30.2        |
| CARP (mc)     | 200  | 32.8             | 10.4        | 53.6                       | 24.9        |
|               | 400  | 33.7             | 11.6        | 54.0                       | 26.5        |

Table A.3: **Copy detection evaluation.** We report mAP on the “strong” subset of the Copydays dataset and compare CARP’s performance against seven SSL methods. Top-1 performers in **bold**, top-2 underlined.

| Method        | Ep   | mAP         |
|---------------|------|-------------|
| Scratch       |      | 25.7        |
| oBoW (mc)     | 200  | 61.5        |
| SeLa-v2 (mc)  | 400  | 76.6        |
| InfoMin       | 800  | 67.5        |
| DeepC-v2 (mc) | 800  | 76.0        |
| SwAV (mc)     | 800  | 76.1        |
| DINO (mc)     | 800  | 78.8        |
| Triplet       | 980  | 81.7        |
| VICReg        | 1000 | <u>83.7</u> |
| MoCo-v3       | 1000 | <u>80.6</u> |
| CARP          | 200  | 82.3        |
|               | 400  | 82.6        |
| CARP (mc)     | 200  | 80.8        |
|               | 400  | <b>84.0</b> |

## 48 B.2 Does the number of partition blocks matter?

49 To better understand the effect of the hyperparameters  $N_{\mathcal{P}}$  and  $N_B$  on the learned representations  
50 and in the training stability, the first row of Table B.2 demonstrates the performance of CARP using  
51 different configurations for the number of partition blocks  $N_{\mathcal{P}}$  and their sizes  $N_B$ . For completeness,  
52 we analyze the effect of removing the momentum encoder in Appendix B.3. We also present an  
53 ablation on the effect of the momentum update in Table B.3.

54 Specifically, as the partition sizes grow and the number of partition blocks  $N_{\mathcal{P}}$  decreases, the quality  
55 of the learned representations tends to decline and eventually collapse. Note that setting a partition  
56 size  $N_B = 65536$  produces a single partition block  $N_{\mathcal{P}}$  containing all prototypes. Precisely, the  
57 setup in the last row and last column of Table B.2 is equivalent to CARL [16]. It shows that a  
58 naive implementation leads to a collapsed solution, and the divide-and-conquer approach of devising  
59 random partitions from the learnable prototypes avoids such trivialities.

Table A.4: **Few-shot classification on VOC07 and INat-2018.** We report mAP at  $n$  on VOC07 and top-1 accuracy for INat-2018 across 5 independent runs, where  $n$  denotes the number of training examples. Standard deviations rounded to the first decimal place.

| Pascal VOC07      |      |                   |                   |                   |                   |                   |             |
|-------------------|------|-------------------|-------------------|-------------------|-------------------|-------------------|-------------|
| Method            | Ep   | n=1               | n=2               | n=4               | n=8               | n=16              | full        |
| PCL v2 [13]       | 200  | <b>47.9 ± 4.1</b> | 59.6 ± 2.7        | 66.2 ± 2.2        | 74.5 ± 0.5        | 78.3 ± 0.4        | 85.4        |
| SeLa-v2 (mc) [1]  | 400  | 42.0 ± 2.2        | 54.5 ± 3.2        | 62.2 ± 1.5        | 71.4 ± 0.5        | 76.9 ± 0.4        | 85.3        |
| DeepC v2 (mc) [2] | 800  | 46.5 ± 2.4        | 58.4 ± 2.9        | 66.5 ± 1.6        | 74.5 ± 0.9        | 79.5 ± 0.4        | 87.6        |
| SwAV (mc) [3]     | 800  | 42.9 ± 2.1        | 54.9 ± 4.4        | 64.0 ± 2.1        | 72.9 ± 1.1        | 78.7 ± 0.6        | 88.1        |
| DINO (mc) [4]     | 800  | 45.6 ± 2.4        | 58.4 ± 3.2        | 66.6 ± 2.1        | 74.8 ± 0.8        | 79.6 ± 0.6        | 88.2        |
| Triplet [17]      | 980  | 43.6 ± 3.3        | 56.2 ± 3.5        | 64.6 ± 1.8        | 73.8 ± 0.1        | 79.6 ± 0.7        | <b>88.3</b> |
| MoCo v3 [7]       | 1000 | 46.6 ± 3.7        | 59.6 ± 2.9        | 67.0 ± 2.4        | 75.4 ± 0.7        | <b>80.2 ± 0.6</b> | 87.4        |
| BarlowT [19]      | 1000 | 42.6 ± 3.7        | 55.5 ± 3.2        | 63.5 ± 1.8        | 72.6 ± 0.1        | 77.6 ± 0.5        | 86.3        |
| CARP (mc)         | 200  | 46.0 ± 3.2        | 58.3 ± 3.3        | 66.5 ± 2.4        | 75.5 ± 0.1        | 79.5 ± 0.6        | 88.0        |
|                   | 400  | 47.1 ± 3.2        | <b>59.8 ± 3.2</b> | <b>67.3 ± 2.2</b> | <b>75.8 ± 1.1</b> | 80.0 ± 0.7        | 88.2        |

  

| INat-2018         |      |                   |                   |                   |                   |                   |             |
|-------------------|------|-------------------|-------------------|-------------------|-------------------|-------------------|-------------|
| Method            | Ep   | n=1               | n=2               | n=4               | n=8               | n=16              | full        |
| PCL [13]          | 200  | 1.4 ± 0.1         | 1.6 ± 0.1         | 2.3 ± 0.2         | 2.9 ± 0.1         | 4.8 ± 0.1         | 2.1         |
| SeLa-v2 (mc) [1]  | 400  | 2.9 ± 0.2         | 4.2 ± 0.1         | 6.3 ± 0.1         | 10.0 ± 0.1        | 13.5 ± 0.1        | 8.2         |
| DeepC v2 (mc) [2] | 800  | 7.6 ± 0.2         | 13.0 ± 0.8        | 20.9 ± 0.5        | 29.6 ± 0.4        | 36.4 ± 0.2        | 32.8        |
| SwAV (mc) [3]     | 800  | 5.3 ± 0.1         | 9.2 ± 0.5         | 15.6 ± 0.1        | 23.1 ± 0.2        | 29.4 ± 0.2        | 24.2        |
| DINO [4]          | 800  | 6.5 ± 0.1         | 12.0 ± 0.5        | 20.4 ± 0.5        | 29.6 ± 0.3        | 35.9 ± 0.3        | 30.4        |
| Triplet [17]      | 980  | 11.4 ± 0.2        | 19.1 ± 0.7        | 28.9 ± 0.8        | 37.6 ± 0.3        | 44.0 ± 0.1        | 41.4        |
| MoCo v3 [7]       | 1000 | 8.1 ± 0.1         | 12.2 ± 0.3        | 18.5 ± 0.3        | 27.2 ± 0.3        | 33.5 ± 0.1        | 28.0        |
| BarlowT [19]      | 1000 | 8.8 ± 0.1         | 12.2 ± 0.5        | 17.2 ± 0.2        | 24.6 ± 0.1        | 30.8 ± 0.1        | 25.3        |
| CARP (mc)         | 200  | 8.6 ± 0.2         | 14.4 ± 0.1        | 23.6 ± 0.3        | 32.7 ± 0.3        | 38.2 ± 0.2        | 33.9        |
|                   | 400  | <b>11.5 ± 0.1</b> | <b>19.6 ± 0.1</b> | <b>29.6 ± 0.9</b> | <b>39.1 ± 0.3</b> | <b>45.1 ± 0.2</b> | <b>42.6</b> |

Table B.1: CARP benefits from over-clustering. Setting a small number of prototypes may hurt the learned representations.

| $K$     | 1024  | 2048  | 4096  | 16384 | 65536 | 262144       |
|---------|-------|-------|-------|-------|-------|--------------|
| $k$ -NN | 48.81 | 49.98 | 50.69 | 50.81 | 51.2  | <b>51.31</b> |

Note that as smaller the block size  $N_B$ , more stable the algorithm will be. However, the quality of the learned representation might decrease since the pseudo-classification tasks, posed by the random partitions, becomes easier with fewer prototypes. On the other hand, a larger block size  $N_B$  poses a more challenging consistency task at the expense of contributing to mode collapse.

For most cases, however, for block sizes ranging from  $N_B = 128$  to  $N_B = 4096$ , CARP learns useful representations and shows robustness to this hyperparameter. By default we set the partition block size  $N_B = 512$ .

### B.3 The importance of the momentum encoder

Table B.2 contrasts CARP’s joint-embedding architectures with and without a momentum encoder, which is equivalent to setting  $\eta = 0$  in the momentum encoder update equation. Different from other SSL methods [4, 9], CARP works with both setups. However, we observe that using a momentum encoder significantly boosts the performance of the learned representations. Table B.2 shows that regardless of block sizes, representations learned using a momentum encoder-based architecture consistently outperform the siamese counterpart.

### B.4 Who provides the best features for downstream evaluation?

One way to understand CARP’s joint-embedding architecture with a momentum encoder is through the teacher-student framework, where the momentum encoder is the teacher that guides the learning

Table B.2: CARP with and without a momentum encoder. Without the random partition strategy (last column), training collapses regardless of using a momentum encoder or a pure siamese architecture.

| $N_B$         | 32    | 64    | 128   | 256   | 512   | 1024  | 2048  | 4096  | 16384 | 65536 |
|---------------|-------|-------|-------|-------|-------|-------|-------|-------|-------|-------|
| w/ mom. enc.  | 49.56 | 50.75 | 51.19 | 51.20 | 51.32 | 51.06 | 51.31 | 51.08 | 49.67 | 0.11  |
| w/o mom. enc. | 48.95 | 49.28 | 48.81 | 47.37 | 46.16 | 44.68 | 44.29 | 44.39 | 47.25 | 0.11  |

Table B.3: The effect of the hyperparameter  $\eta$  on the momentum encoder updates. In the last column,  $\eta$  starts as  $\eta = 0.99$  and it is annealed to  $\eta = 1.0$  following a cosine schedule.

| $\eta$  | 0    | 0.5  | 0.9  | 0.99 | 0.999 | 0.99 $\rightarrow$ 1.0 |
|---------|------|------|------|------|-------|------------------------|
| $k$ -NN | 51.0 | 50.2 | 50.3 | 51.1 | 50.1  | <b>51.3</b>            |

77 student. The addition of the momentum encoder raises the question of which module produces the  
 78 best representations. To answer this question, Figure B.1 explores the  $k$ -NN performance when  
 79 extracting features from the momentum encoder (teacher) versus the student. We observe that  
 80 teachers’ representations constantly outperform the students’ during training. However, by the end of  
 81 the training, the student catches up with the teacher.

## 82 C Implementation Details

### 83 C.1 Experimental Setup

84 We train CARP on the ImageNet-1M unlabeled dataset using ResNet50 [10] encoders. We take the  
 85 output representation of the last global average pooling layer (a 2048-dim vector) and project it to a  
 86 256-dim vector. Following Caron et al.’s [4] work, our MLP projection head contains 3 dense layers  
 87 with batch normalization and the GELU activations. The hidden units of the projection head contain  
 88 2048 neurons. The 256-dim representation vector is fed to an assigner MLP that outputs unnormalized  
 89 probabilities w.r.t. the learnable prototypes. By default, the assigner function is implemented as a  
 90 linear layer and trains  $K = 65\,536$  prototypes. To generate the random partitions, we set the number  
 91 of partitions  $N_P = 128$ , which creates subsets containing  $N_B = 512$  randomly chosen prototypes.  
 92 We use the same data augmentations proposed by Grill et al. [9] to generate synthetic views. The  
 93 protocol creates three data augmentation pipelines, the first two to generate global views and the last  
 94 to generate multi-crops. CARP is pre-trained with the LARS [18] optimizer, end to end, with weight  
 95 decay of  $1 \times 10^{-6}$ . For models training up to 200 epochs, the learning rate starts from 0.6 and decays  
 96 to 0.006 with a cosine scheduling [14] without warmups. For models pre-trained for more than 400  
 97 epochs, the learning rate starts at 0.3 and decays to 0.003 using the same cosine scheduler. We train  
 98 the system with a global batch size of 4096 observations. For all experiments, we used 4 A100 40GB

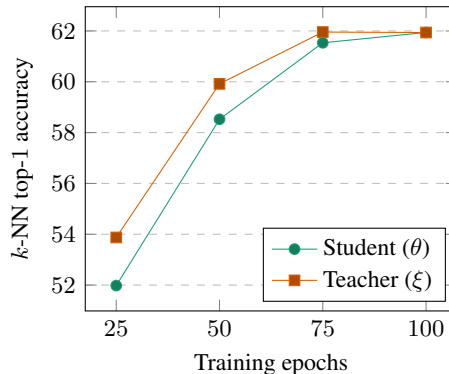

Figure B.1: During training, the representations extracted from the teacher outperform the representations from the student network.

99 GPUs and gradient accumulation to simulate large batch sizes. Cf. to Appendix E for a PyTorch style  
100 pseudo-code.

## 101 D Evaluation Protocols

### 102 D.1 Linear evaluation

103 For ImageNet evaluation, we trained a linear classifier on top of the frozen representations extracted  
104 from the last average pooling layer of the ResNet50 encoder, for 100 epochs, following He et al.’s [11]  
105 protocol. We minimize the cross-entropy loss with the LARS optimizer, a learning rate of 1.0, and a  
106 batch size of 4096 observations. For each input image, we take a random crop followed by a resize  
107 to  $224 \times 224$ , and an optional horizontal flipping. For testing, images are resized to  $256 \times 256$  and  
108 center-cropped to  $224 \times 224$ .

### 109 D.2 Few-shot evaluation

110 We measure the few-shot learning capabilities of SSL methods on the Pascal VOC07 and iNaturalist  
111 2018 datasets. For VOC07, we are interested in the multi-label classification performance. We closely  
112 follow Li et al.’s [13] protocol and train Linear SVNs on fixed 2048-dim representations from many  
113 SSL ResNet-50 encoders.

114 For INat-2018, we expand the few-shot evaluation challenge to a complex scenario containing more  
115 than 8k classes. We train linear classifiers for 20 epochs on fixed 2048-dim representations. We use  
116 the SGD optimizer. The learning rate starts at 0.03 and decays by a factor of 10 in epochs 12 and 18,  
117 respectively.

118 For both datasets, we vary the number  $n$  of labeled examples per class and report the average results  
119 across 5 independent runs.

### 120 D.3 $k$ -NN evaluation

121 To perform the  $k$ -NN evaluation, we use pre-trained SSL ResNet50 encoders as feature extractors to  
122 compute and store the representations from many vision datasets. Following Caron et al.’s [4] setup,  
123 the representation vector for a test image is compared against all representations from the training  
124 split and a prediction is made via weighted voting. If one of the closest neighbors has the same  
125 class as the test image, it contributes to the final voting as  $\alpha_i = \exp\left(\frac{M_i z}{\tau}\right)$  where  $M$  is a memory  
126 bank containing representations from the training data,  $z$  is the representation from the test data,  
127 and  $\tau$  is the temperature hyper-parameter. For all experiments, we run  $k$ -NN with configurations of  
128  $K_{\text{near}} \in \{10, 20, 100, 200\}$ . For most experiments, a value of  $k = 20$  is consistently the best setup  
129 across all methods.

### 130 D.4 $k$ -means evaluation

131 Similar to  $k$ -NN evaluation, we take self-supervised pre-trained encoders and use them to extract  
132 2048-dim feature vectors from the training set of datasets like CIFAR-10/100 and ImageNet-1M. For  
133 ImageNet-1M, we use only 10% of the training data following the 10% subset from Chen et al. [5].  
134 We fit  $k$ -means classifiers on the learned representations of the training set and use the validation  
135 split to assess the quality of the learned prototypes. We report three metrics to assess clustering  
136 performance: Normalized Mutual Information (NMI), Adjusted Mutual Information (AMI), and  
137 Adjusted Rand Index (ARI). The number of prototypes  $k$  is set to be the number of true classes of  
138 each dataset. We use the faiss library [12] for fast  $k$ -means. For each experiment, we run  $k$ -means  
139 for 100 iterations, 20 redos, and spherical normalization. To measure the clustering performance of  
140 CARP, we observed that a 400 epoch model with a learning rate of 0.3 slightly outperformed the  
141 other instances; therefore, we use this model to report results in Table 2. This instance of CARP uses  
142 two views and is only used for clustering evaluation.

### 143 D.5 Image retrieval evaluation

144 We strictly follow the evaluation script `eval_image_retrieval.py` provided by Caron et al. [4],  
145 for the image retrieval evaluation task. The script uses the revisited Oxford and Paris image retrieval

146 datasets [15]. The dataset contains three protocols of varying difficulty levels. We take the ImageNet  
 147 pre-trained ResNet-50 encoder from CARP, freeze the weights, and apply  $k$ -NN evaluation directly  
 148 to the frozen 2048-d features for retrieval, conditioned on a query image.

## 149 D.6 Copy detection evaluation

150 We strictly follow the evaluation script `eval_copy_detection.py` provided by Caron et al. [4] for  
 151 copy detection evaluation. The evaluation is performed on the INRIA Copydays dataset [8]. The  
 152 dataset contains holiday pictures in the format query/database. Each image has suffered three kinds  
 153 of artificial attacks: JPEG, cropping, and “strong.” We report performance evaluation on the “strong”  
 154 subset. Images in the “strong” subset were intentionally distorted by blur, insertions, print, and scan.  
 155 The task is to recognize these images despite distortion. We take the frozen CARP ResNet-50 encoder  
 156 and extract 2048-dim vectors from query and database images at resolution  $320^2$ . Then, we perform  
 157 copy detection with cosine similarity between query and database features. We report mean average  
 158 precision (mAP) as a performance metric. Unlike the benchmark described by Caron et al. [4], we do  
 159 not utilize additional distractors, nor do we centralize the data using statistics learned in a different  
 160 set on images.

## 161 E Pseudocode of CARP in a PyTorch-like Style

```
# NB: number of random prototypes within a block
# K: number of prototypes
# NP: number of blocks in the partition, i.e.  $K // NB$ 
# N: batch size
for x1, x2 in loader:
    # student and teacher branches
    z1, w1 = enc(x1), mom_enc(x1) #  $[N, K]$ 
    z2, w2 = enc(x2), mom_enc(x2) #  $[N, K]$ 

    s_logits, t_logits = [z1, z2], [w1, w2]

    # sample cluster indices with no replacement
    rand_proto_ids = multinomial(ones(K), K, False)
    split_proto_ids = stack(split(rand_proto_ids, NB))
    preds_list, targets_list = [], []

    for s_log, t_log in zip(s_logits, t_logits):
        preds = get_logits_gr(s_log, split_proto_ids)
        targets = get_logits_gr(t_log, split_proto_ids)

        preds_list.append(preds)
        targets_list.append(targets)

    loss = loss_fn(preds_list, targets_list)
    # perform gradient descent steps

def loss_fn(s_list, t_list):
    c_loss = consistency_loss(s_list[0], t_list[1])
    c_loss += consistency_loss(s_list[1], t_list[0])

    s = cat(s_list, dim=1)
    t = cat(t_list, dim=1)
    probs = cat([s, t], dim=1).transpose(0, 1)

    e_loss = kl_div(mean(probs, dim=0))
    return c_loss + e_loss

def consistency_loss(s, t):
    loss = einsum("knc,knc->kn", [s, t])
    return -log(loss).mean()
```



```

def kl_div(p):
    return mean(log(K) + sum(p * log(p), dim=-1))

def get_logits_gr(logits, proto_ids):
    logits_gr = logits[:, proto_ids.flatten()]
    logits_gr = logits_gr.split(NB, dim=1)
    logits_gr = stack(logits_gr, dim=0)
    return softmax(logits_gr, dim=-1) # [NP, N, NB]

```

## References

- [1] Y.M. Asano, C. Rupprecht, and A. Vedaldi. Self-labelling via simultaneous clustering and representation learning. In *Inter. Conf. Learn. Represent. (ICLR)*, 2020. URL <https://openreview.net/forum?id=Hyx-jyBFPr>.
- [2] Mathilde Caron, Piotr Bojanowski, Armand Joulin, and Matthijs Douze. Deep clustering for unsupervised learning of visual features. In *European Conf. Comput. Vis. (ECCV)*, pages 132–149, 2018.
- [3] Mathilde Caron, Ishan Misra, Julien Mairal, Priya Goyal, Piotr Bojanowski, and Armand Joulin. Unsupervised learning of visual features by contrasting cluster assignments. In *Adv. Neural Inf. Process. Sys. (NeurIPS)*, 2020.
- [4] Mathilde Caron, Hugo Touvron, Ishan Misra, Hervé Jégou, Julien Mairal, Piotr Bojanowski, and Armand Joulin. Emerging properties in self-supervised vision transformers. In *IEEE/CVF Inter. Conf. Comput. Vis. Pattern Recog. (CVPR)*, pages 9650–9660, 2021.
- [5] Ting Chen, Simon Kornblith, Mohammad Norouzi, and Geoffrey Hinton. A simple framework for contrastive learning of visual representations. In *Inter. Conf. Mach. Learn. (ICML)*, 2020.
- [6] Xinlei Chen, Haoqi Fan, Ross Girshick, and Kaiming He. Improved baselines with momentum contrastive learning. *arXiv preprint arXiv:2003.04297*, 2020.
- [7] Xinlei Chen\*, Saining Xie\*, and Kaiming He. An empirical study of training self-supervised vision transformers. In *IEEE Inter. Conf. Comput. Vis. (ICCV)*, 2021.
- [8] Matthijs Douze, Hervé Jégou, Harsimrat Sandhawalia, Laurent Amsaleg, and Cordelia Schmid. Evaluation of gist descriptors for web-scale image search. In *ACM Inter. Conf. Image Video Ret. (CIVR)*, pages 1–8, 2009.
- [9] Jean-Bastien Grill, Florian Strub, Florent Altché, Corentin Tallec, Pierre H Richemond, Elena Buchatskaya, Carl Doersch, Bernardo Avila Pires, Zhaohan Daniel Guo, Mohammad Gheshlaghi Azar, et al. Bootstrap your own latent: A new approach to self-supervised learning. In *Adv. Neural Inf. Process. Sys. (NeurIPS)*, 2020.
- [10] Kaiming He, Xiangyu Zhang, Shaoqing Ren, and Jian Sun. Deep residual learning for image recognition. In *IEEE/CVF Inter. Conf. Comput. Vis. Pattern Recog. (CVPR)*, pages 770–778, 2016.
- [11] Kaiming He, Haoqi Fan, Yuxin Wu, Saining Xie, and Ross Girshick. Momentum contrast for unsupervised visual representation learning. In *IEEE/CVF Inter. Conf. Comput. Vis. Pattern Recog. (CVPR)*, pages 9729–9738, 2020.
- [12] Jeff Johnson, Matthijs Douze, and Hervé Jégou. Billion-scale similarity search with GPUs. *IEEE Transactions on Big Data*, 7(3):535–547, 2019.
- [13] Junnan Li, Pan Zhou, Caiming Xiong, and Steven C.H. Hoi. Prototypical contrastive learning of unsupervised representations. In *Inter. Conf. Learn. Represent. (ICLR)*, 2021.
- [14] Ilya Loshchilov and Frank Hutter. SGDR: Stochastic gradient descent with warm restarts. In *Inter. Conf. Learn. Represent. (ICLR)*, 2016.



- 200 [15] Filip Radenović, Ahmet Iscen, Giorgos Tolias, Yannis Avrithis, and Ondřej Chum. Revisiting  
201 oxford and paris: Large-scale image retrieval benchmarking. In *IEEE/CVF Inter. Conf. Comput.*  
202 *Vis. Pattern Recog. (CVPR)*, pages 5706–5715, 2018.
- 203 [16] Thalles Santos Silva and Adín Ramírez Rivera. Consistent assignment for representation  
204 learning. In *Inter. Conf. Learn. Represent. Wksp. (ICLRW)*, 2021.
- 205 [17] Guangrun Wang, Keze Wang, Guangcong Wang, Philip HS Torr, and Liang Lin. Solving  
206 inefficiency of self-supervised representation learning. In *IEEE Inter. Conf. Comput. Vis.*  
207 *(ICCV)*, pages 9505–9515, 2021.
- 208 [18] Yang You, Igor Gitman, and Boris Ginsburg. Large batch training of convolutional networks.  
209 *arXiv preprint arXiv:1708.03888*, 2017.
- 210 [19] Jure Zbontar, Li Jing, Ishan Misra, Yann LeCun, and Stéphane Deny. Barlow twins: Self-  
211 supervised learning via redundancy reduction. In *Inter. Conf. Learn. Represent. Wksp. (ICLRW)*,  
212 2021.
